# Supplementary material for: Determining the hydrocarbon chain growth pathway in Fischer–Tropsch synthesis through DFT calculations: impact of cobalt cluster size
Source: Royal Society of Chemistry journal article supplement (doi:10.1039/d4nj01435a), 2024-01-01
Supplement: d4nj01435a1.pdf [file d4nj01435a1.pdf]

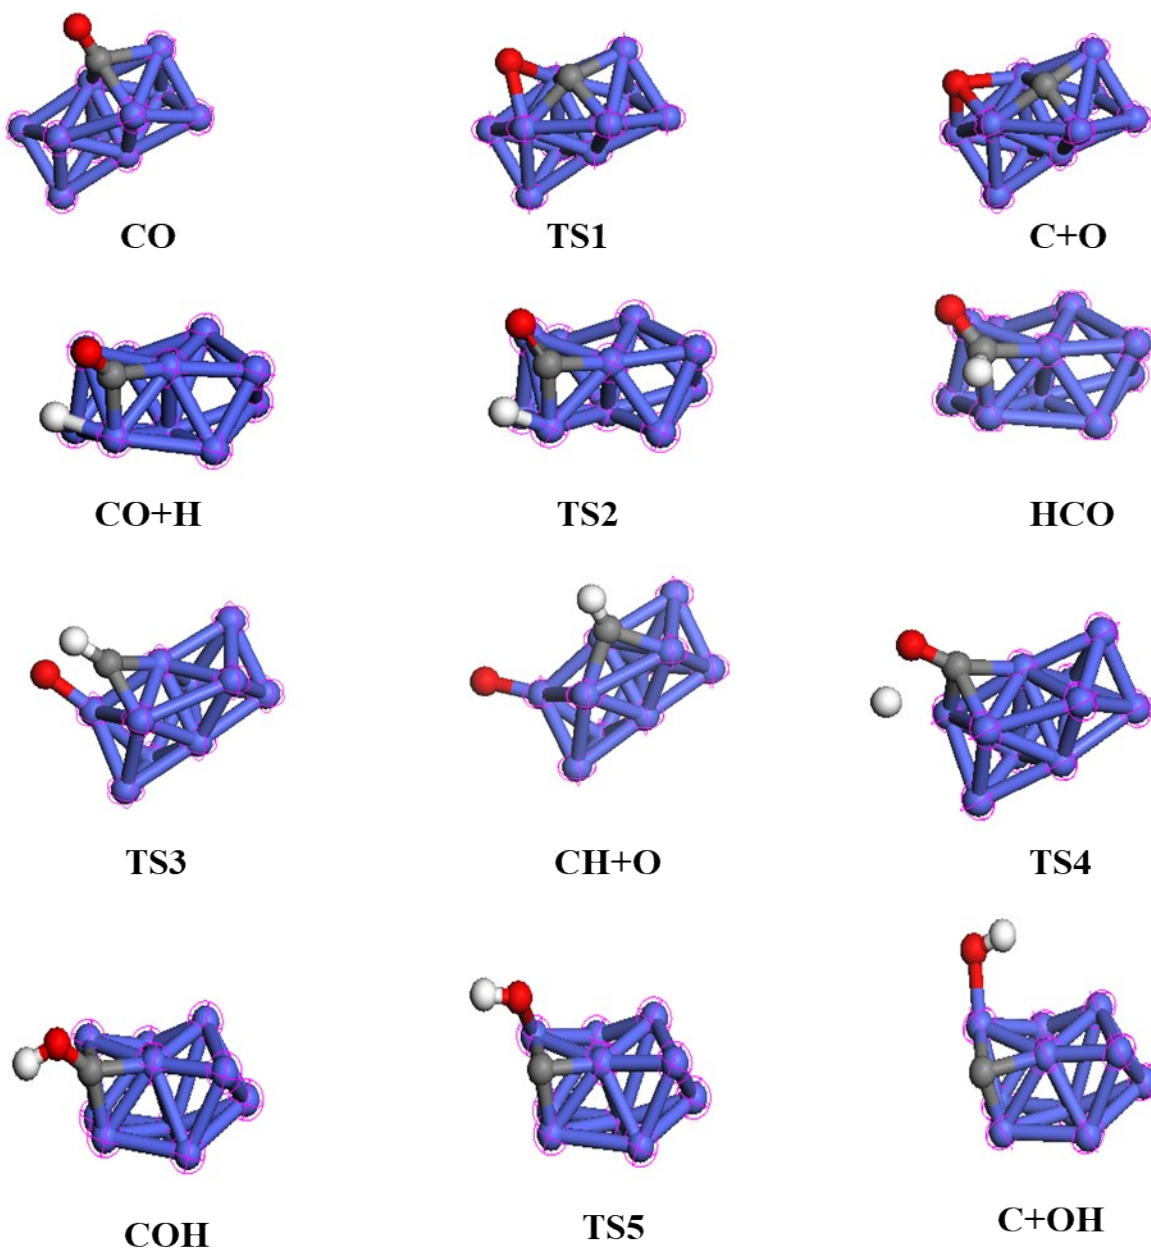

Fig S1. Activation of CO on Co-10 cluster (Co atom: blue, C atom: gray, H atom: white, O atom: red).

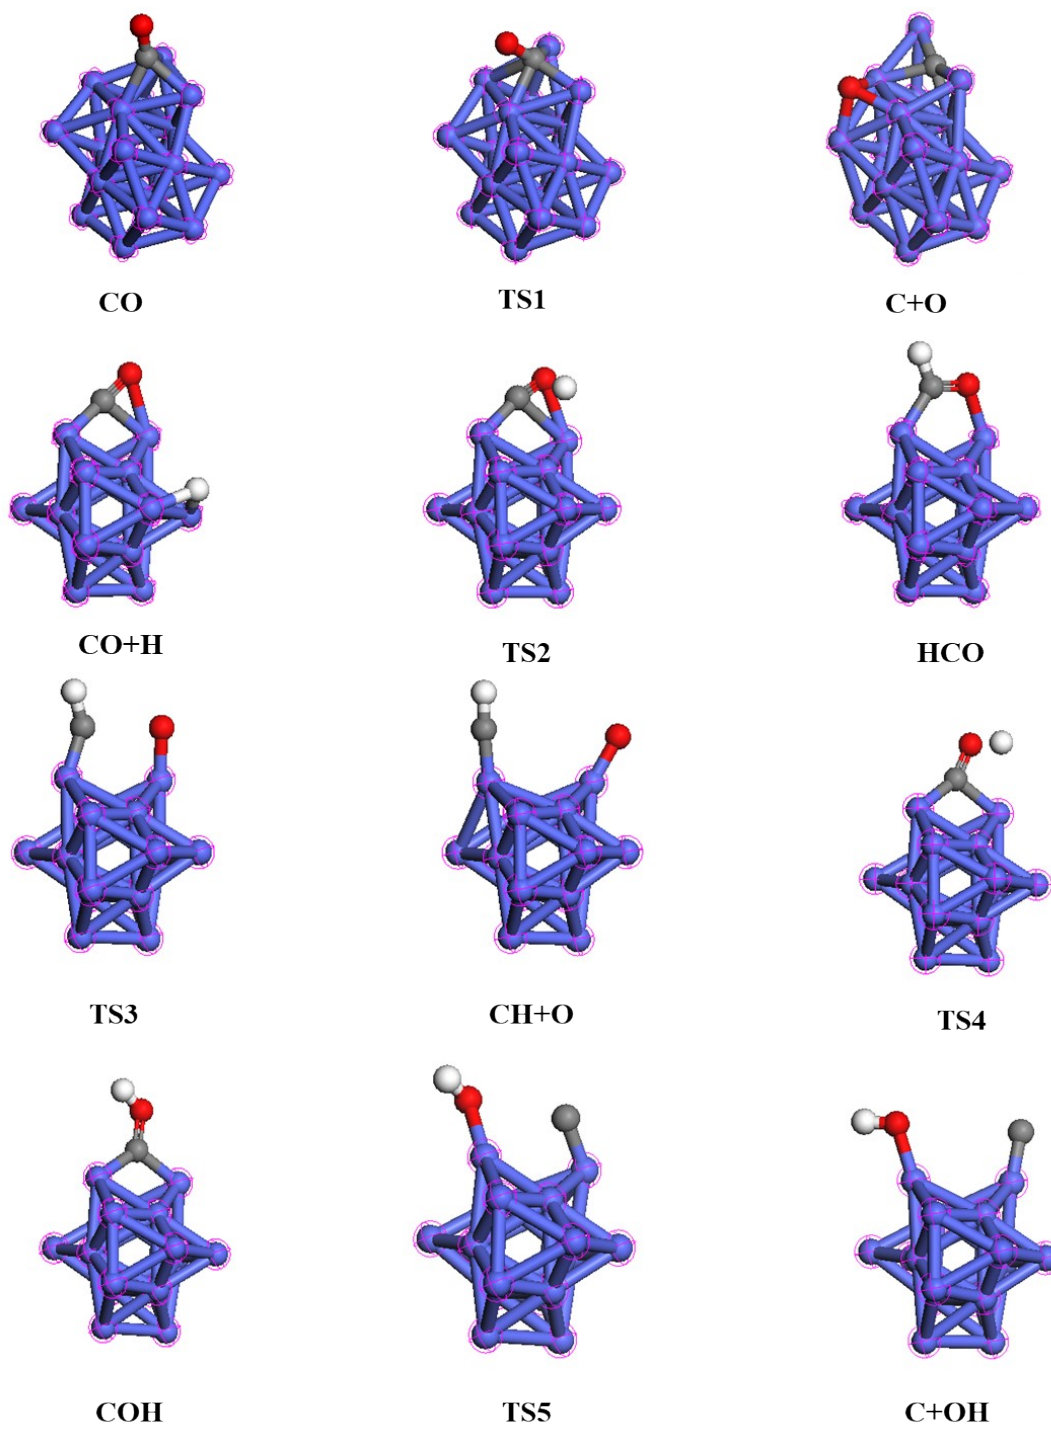

Fig S2. Activation of CO on Co-18 cluster (Co atom: blue, C atom: gray, H atom: white, O atom: red).

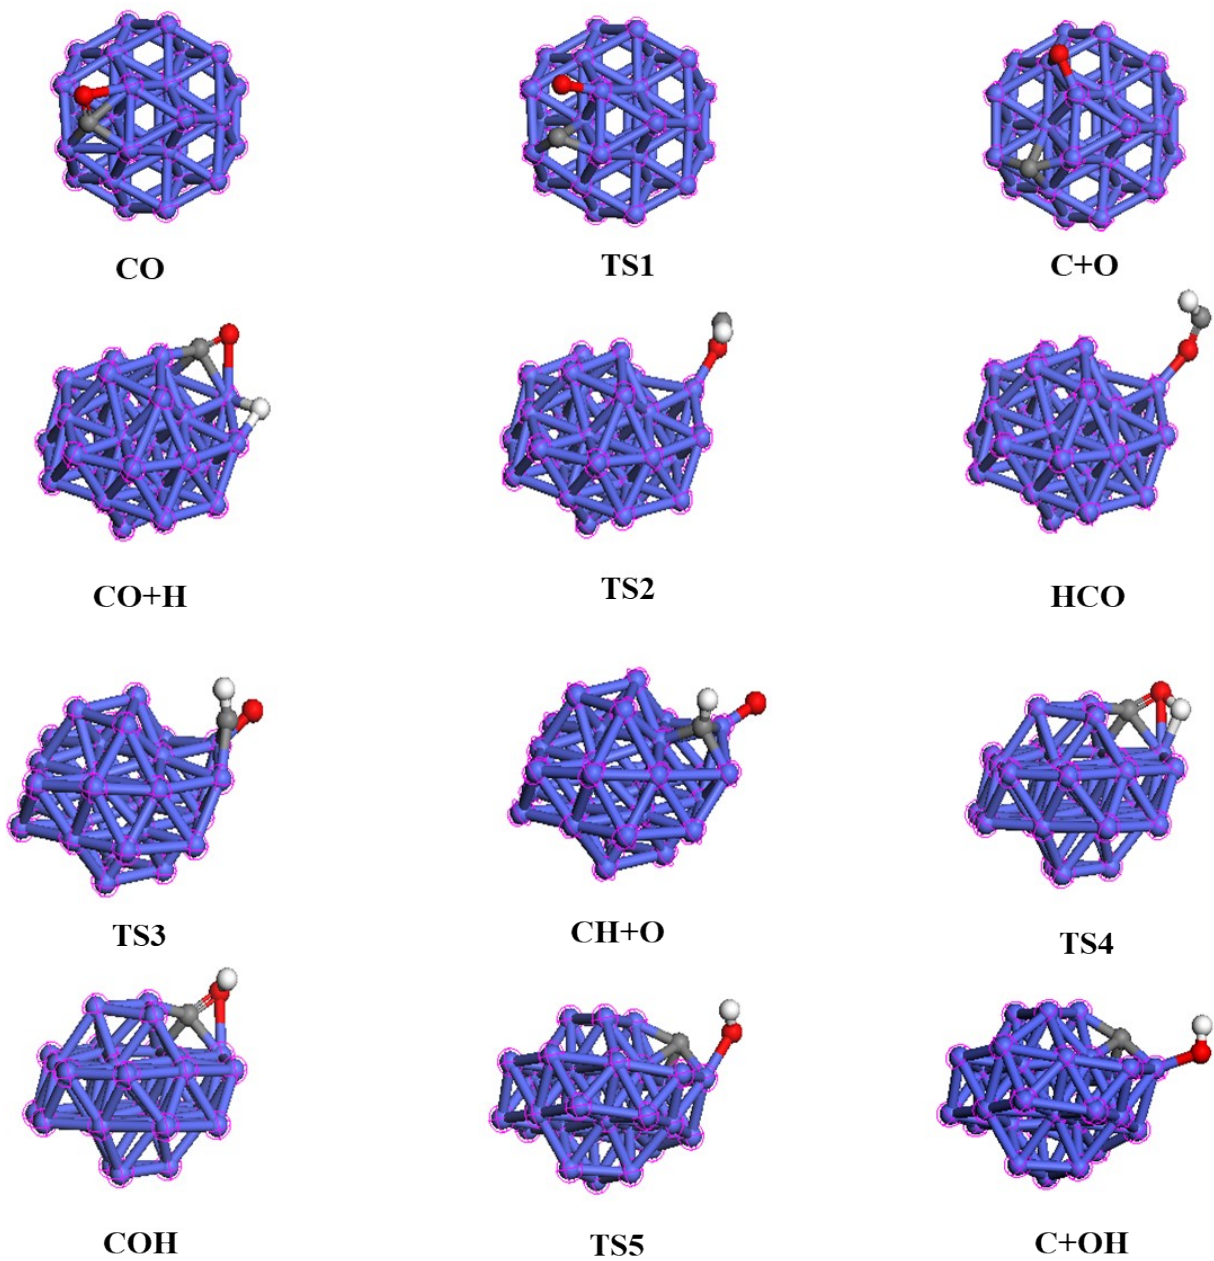

Fig S3. Activation of CO on Co-30 cluster (Co atom: blue, C atom: gray, H atom: white, O atom: red).

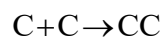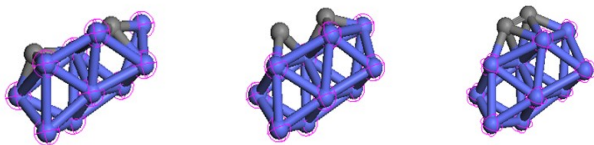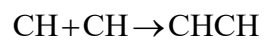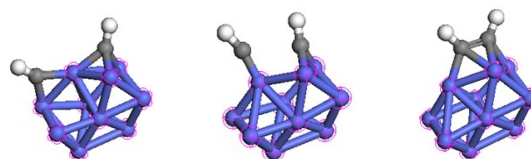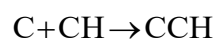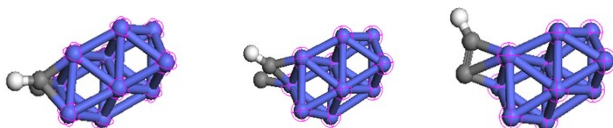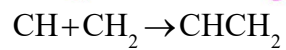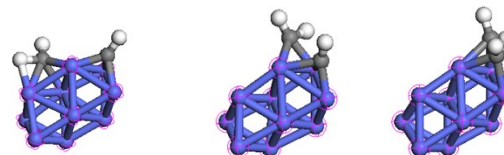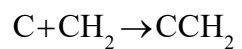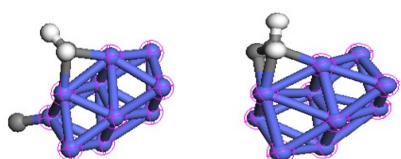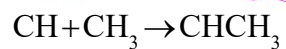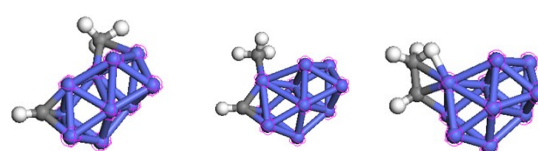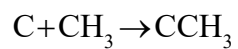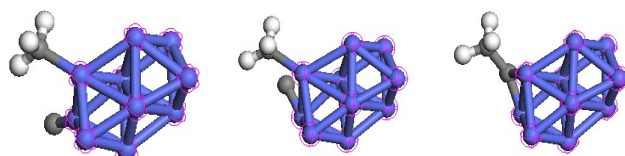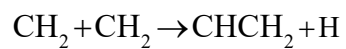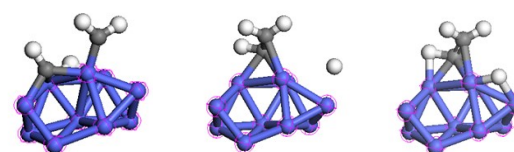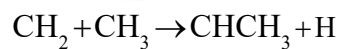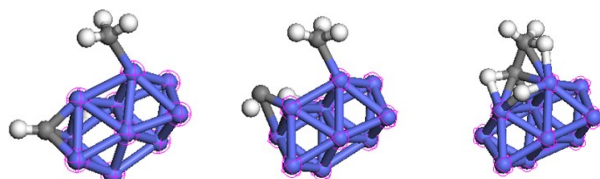

Fig S4. Chain growth of hydrocarbons in C-C reaction on Co-10 cluster (Co atom: blue, C atom: gray, H atom: white).

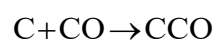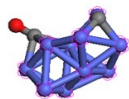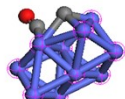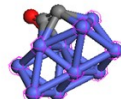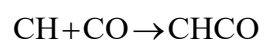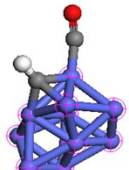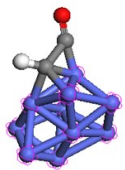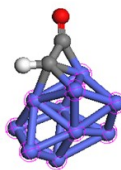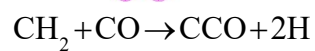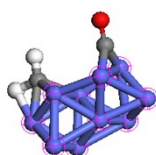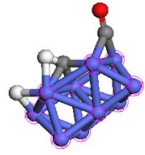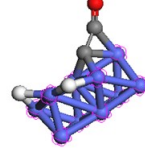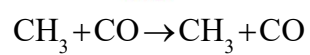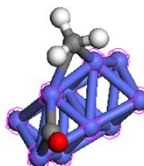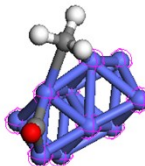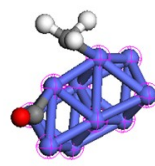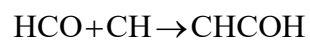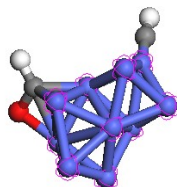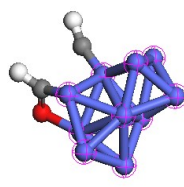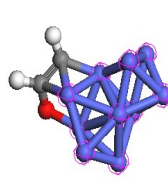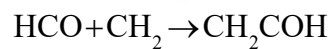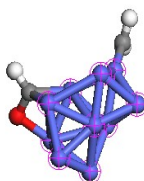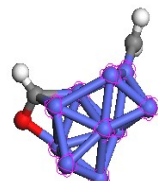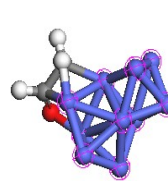

Fig S5. Chain growth of hydrocarbons in C-CO reaction on Co-10 cluster (Co atom: blue, C atom: gray, H atom: white, O atom: red).

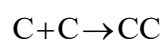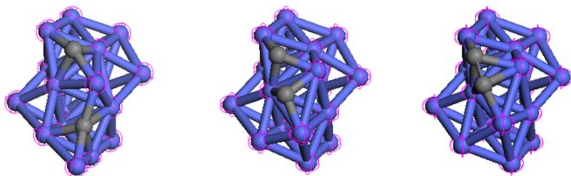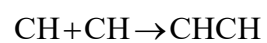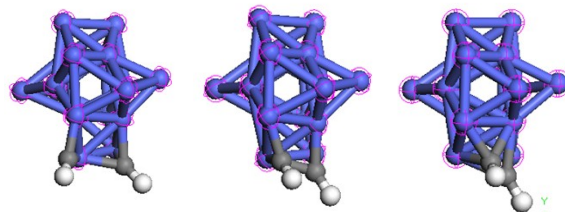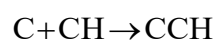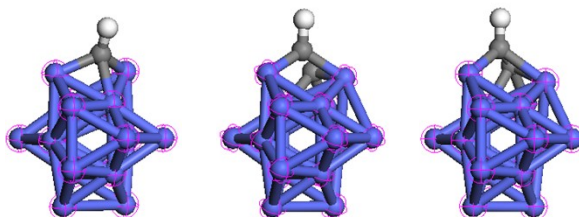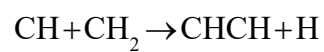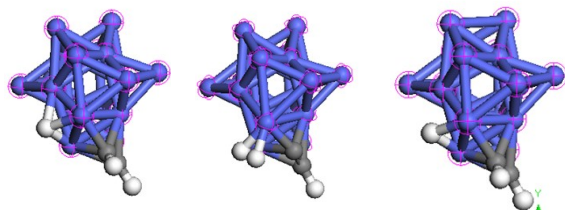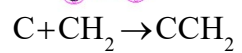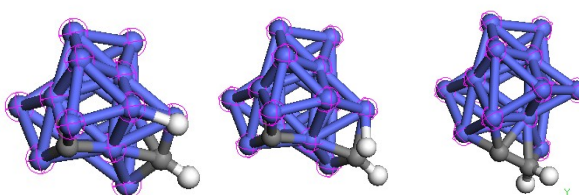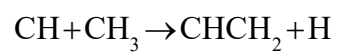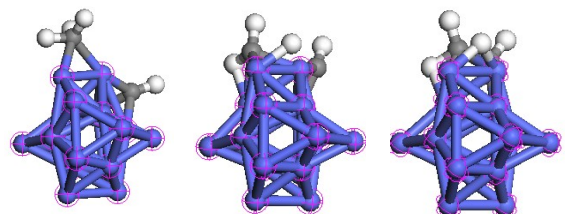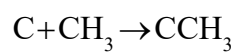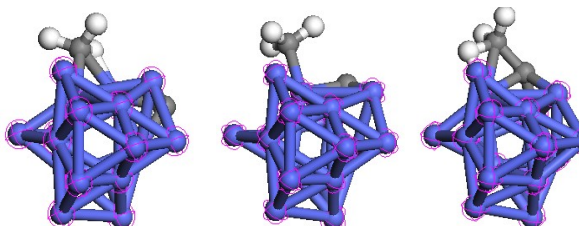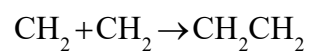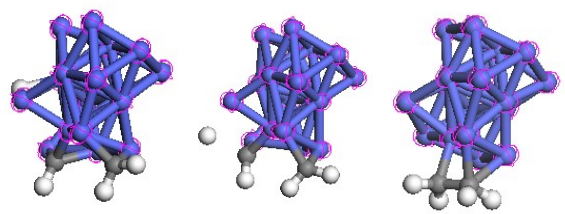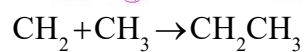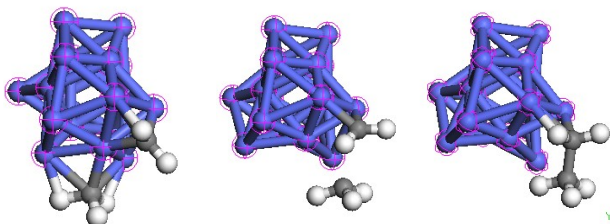

Fig S6. Chain growth of hydrocarbons in C-C reaction on Co-18 cluster (Co atom: blue, C atom: gray, H atom: white).

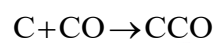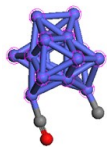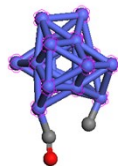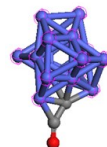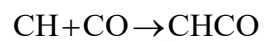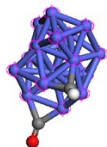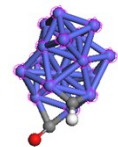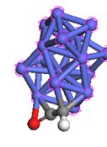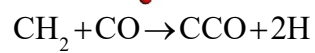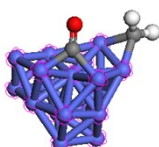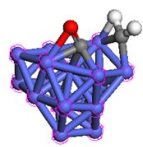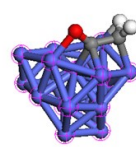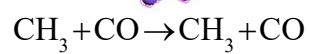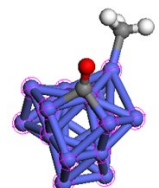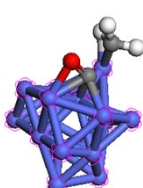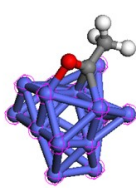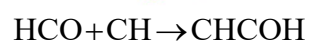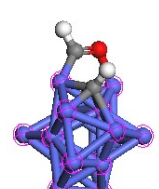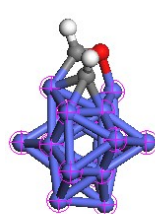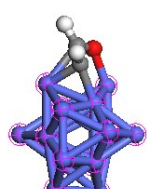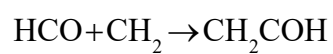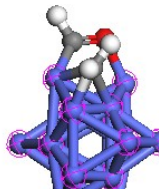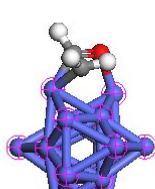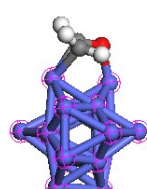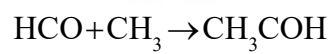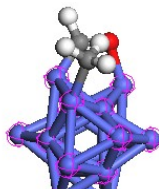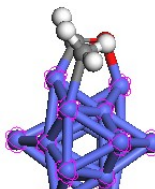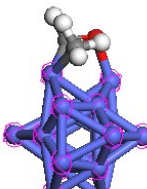

Fig S7. Chain growth of hydrocarbons in C-CO reaction on Co-18 cluster (Co atom: blue, C atom: gray, H atom: white, O atom: red).

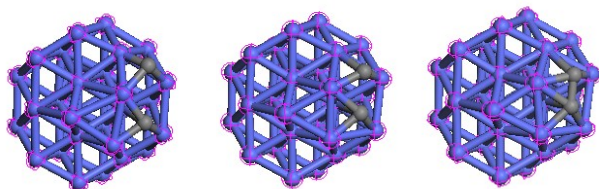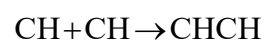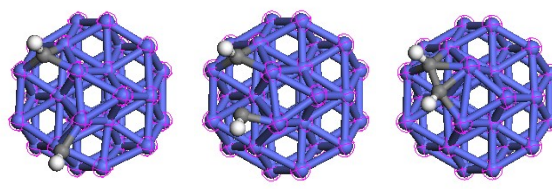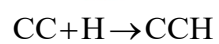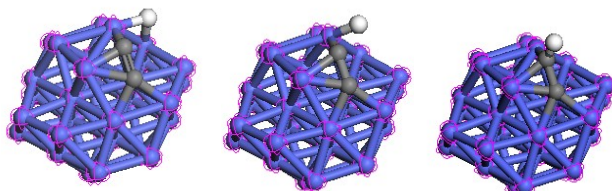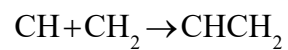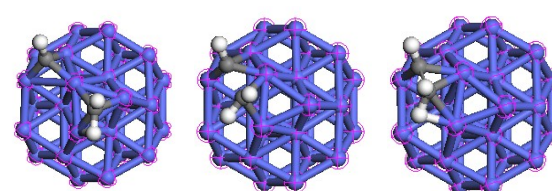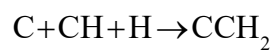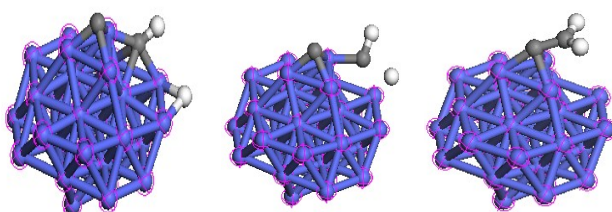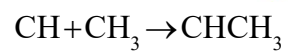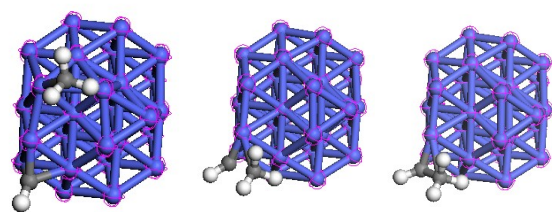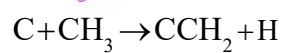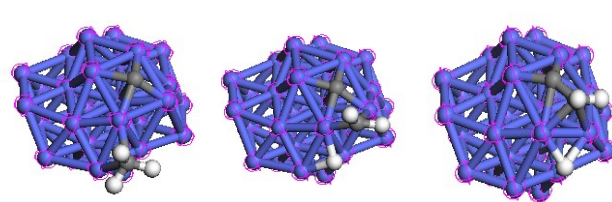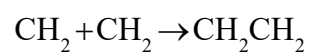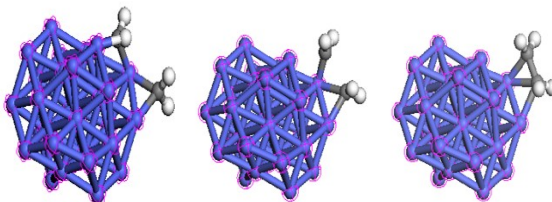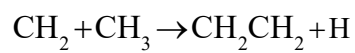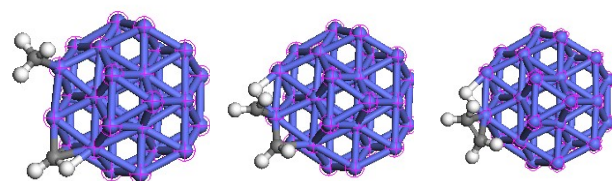

Fig S8. Chain growth of hydrocarbons in C-C reaction on Co-30 cluster (Co atom: blue, C atom: gray, H atom: white).



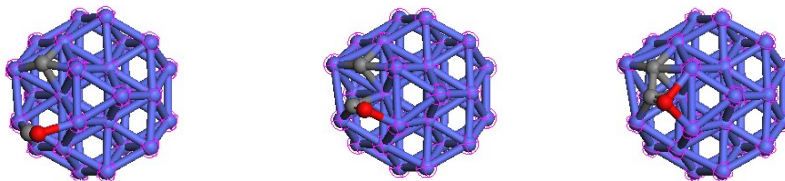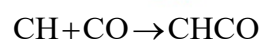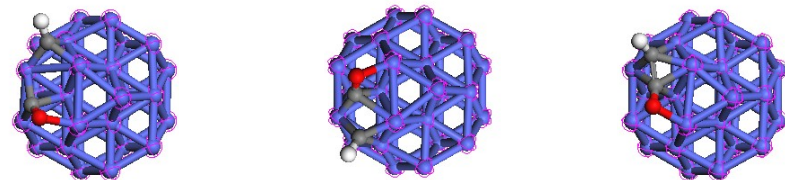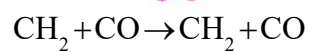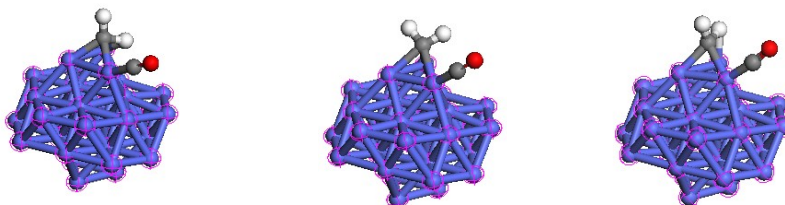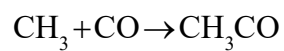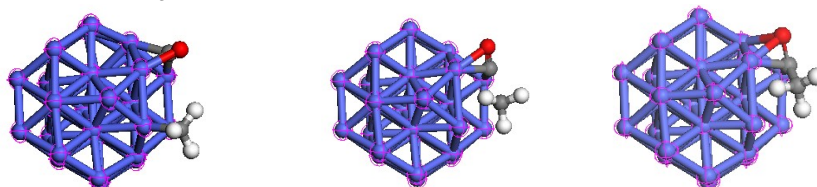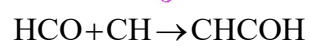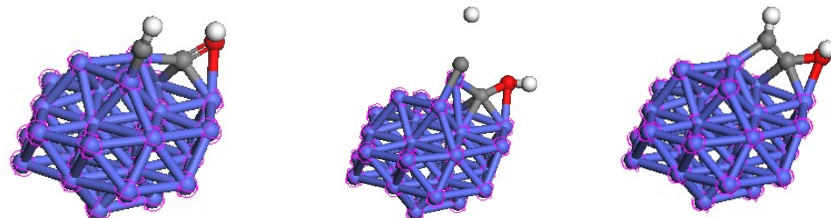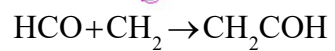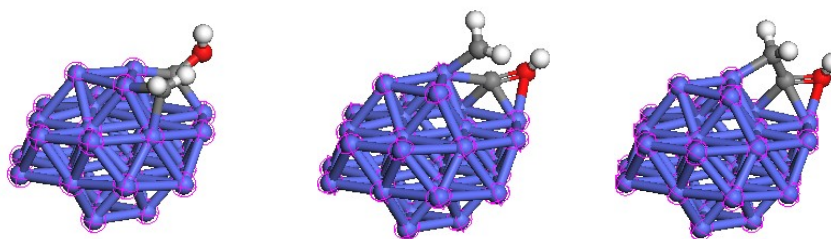

Fig S9. Chain growth of hydrocarbons in C-CO reaction on Co-30 cluster (Co atom: blue, C atom: gray, H atom: white, O atom: red).

Table S1. The adsorption energy ( $E_a$ , eV) of  $C_1$  species on Co-10, Co-18 and Co-30 clusters.

|                 | Co-10 | Co-18 | Co-30  |
|-----------------|-------|-------|--------|
| CH              | -6.34 | -8.37 | -18.89 |
| CH <sub>2</sub> | -5.24 | -6.01 | -17.13 |
| CH <sub>3</sub> | -2.63 | -3.60 | -8.22  |
| CH <sub>4</sub> | 0.049 | -0.88 | -5.11  |

Table S2. C-C bond length ( $d_{C-C}$ , Å), C-O bond length ( $d_{C-O}$ , Å), Barrier energy ( $E_b$ , eV), Reaction energy ( $\Delta E_r$ , eV) Effective barrier energy ( $E_{eff}$ , eV) of formation hydrocarbon species on Co-10clusters.

| Reaction                         | $d_{C-C}$ (Å) | $d_{C-O}$ (Å) | $E_b$ (eV) | $\Delta E_r$ (eV) | $E_{eff}$ (eV) |
|----------------------------------|---------------|---------------|------------|-------------------|----------------|
| C+C                              | 1.35          |               | 2.16       | 0.2               | 4.02           |
| C+CH                             | 1.34          |               | 1.23       | -0.69             | 2.75           |
| C+CH <sub>2</sub>                | 1.39          |               | 1.58       | -1.86             | 1.92           |
| C+CH <sub>3</sub>                | 1.48          |               | 1.09       | -1.1              | 1.43           |
| CH+CH                            | 1.40          |               | 2.24       | -0.22             | 3.43           |
| CH+CH <sub>2</sub>               | 1.43          |               | 1.82       | 0.05              | 2.47           |
| CH+CH <sub>3</sub>               | 1.50          |               | 0.99       | 0.48              | 0.99           |
| CH <sub>2</sub> +CH <sub>2</sub> | --            |               | 1.33       | -0.78             | 1.43           |
| CH <sub>2</sub> +CH <sub>3</sub> | --            |               | 4.21       | 1.66              | 3.67           |
| C+CO                             | 1.28          | 1.40          | 1.74       | 1.13              | 2.07           |
| CH+CO                            | 1.43          | 1.22          | 1.34       | 1.01              | 1.34           |
| CH <sub>2</sub> +CO              | --            | --            | 0.87       | -0.05             | 0.32           |
| CH <sub>3</sub> +CO              | --            | --            | 0.5        | 0.17              | -0.14          |
| CH+CHO                           | 1.42          | 1.35          | 1.07       | -1.76             | 1.07           |

Table S3. C-C bond length ( $d_{C-C}$ , Å), C-O bond length ( $d_{C-O}$ , Å), Barrier energy ( $E_b$ , eV), Reaction energy ( $\Delta E_r$ , eV) Effective barrier energy ( $E_{eff}$ , eV) of formation hydrocarbon species on Co-18 clusters.

| Reaction                         | $d_{C-C}$ (Å) | $d_{C-O}$ (Å) | $E_b$ (eV) | $\Delta E_r$ (eV) | $E_{eff}$ (eV) |
|----------------------------------|---------------|---------------|------------|-------------------|----------------|
| C+C                              | 1.37          |               | 2.99       | 1.88              | 1.82           |
| C+CH                             | 1.39          |               | 1.71       | 0.51              | 0.41           |
| C+CH <sub>2</sub>                | 1.44          |               | 1.44       | 1.23              | 0.98           |
| C+CH <sub>3</sub>                | 1.48          |               | 0.42       | -0.42             | 0.42           |
| CH+CH                            | 1.43          |               | 0.63       | -0.44             | -0.8           |
| CH+CH <sub>2</sub>               | --            |               | 1.78       | 0.14              | 1.19           |
| CH+CH <sub>3</sub>               | --            |               | 1.33       | 0.37              | 1.2            |
| CH <sub>2</sub> +CH <sub>2</sub> | 1.48          |               | 2.67       | 0.57              | 2.91           |
| CH <sub>2</sub> +CH <sub>3</sub> | 1.53          |               | 2.00       | -0.09             | 2.71           |
| C+CO                             | 1.41          | 1.23          | 0.66       | -1.93             | 0.66           |
| CH+CO                            | 1.44          | 1.29          | 1.72       | 1.26              | 1.59           |
| CH <sub>2</sub> +CO              | 1.49          | 1.33          | 1.49       | 0.64              | 2.19           |
| CH <sub>3</sub> +CO              | 1.52          | 1.33          | 2.26       | 1.17              | 3.43           |
| CH+CHO                           | 1.43          | 1.30          | 0.67       | 0.08              | 0.67           |
| CH <sub>2</sub> +CHO             | 1.43          | 1.30          | 0.93       | -0.12             | 1.77           |
| CH <sub>3</sub> +CHO             | --            | --            | 0.83       | 0.55              | 2.13           |

Table S4. C-C bond length ( $d_{C-C}$ , Å), C-O bond length ( $d_{C-O}$ , Å), Barrier energy ( $E_b$ , eV), Reaction energy ( $\Delta E_r$ , eV) Effective barrier energy ( $E_{eff}$ , eV) of formation hydrocarbon species on Co-30clusters.

| Reaction                         | $d_{C-C}$ (Å) | $d_{C-O}$ (Å) | $E_b$ (eV) | $\Delta E_r$ (eV) | $E_{eff}$ (eV) |
|----------------------------------|---------------|---------------|------------|-------------------|----------------|
| C+C                              | 1.46          |               | 0.48       | 0.02              | 0.48           |
| C+CH                             | 1.42          |               | 0.67       | -0.34             | 0.53           |
| C+CH <sub>2</sub>                | 1.39          |               | 3.50       | 0.91              | 3.90           |
| C+CH <sub>3</sub>                | --            | s             | 1.28       | 0.11              | 0.94           |
| CH+CH                            | 1.45          |               | 1.65       | -0.22             | 1.38           |
| CH+CH <sub>2</sub>               | 1.47          |               | 1.52       | 0.42              | 1.79           |
| CH+CH <sub>3</sub>               | 1.51          |               | 2.09       | 0.61              | 1.61           |
| CH <sub>2</sub> +CH <sub>2</sub> | 1.47          |               | 1.57       | -0.12             | 2.38           |
| CH <sub>2</sub> +CH <sub>3</sub> | --            |               | 2.27       | -0.3              | 2.33           |
| C+CO                             | 1.45          | 1.37          | 1.78       | 0.85              | 1.91           |
| CH+CO                            | 1.47          | 1.33          | 0.97       | 0.41              | 0.97           |
| CH <sub>2</sub> +CO              | --            | --            | 0.7        | 0.06              | 1.23           |
| CH <sub>3</sub> +CO              | 1.52          | 1.35          | 2.92       | 1.59              | 2.71           |
| CH+HCO                           | 1.37          |               | 6.05       | -0.57             | 5.91           |
| CH <sub>2</sub> +HCO             | 1.47          |               | 1.8        | 0.34              | 2.2            |
